# Supplementary material for: Oral nanozyme-engineered probiotics for the treatment of ulcerative colitis
Source: Royal Society of Chemistry journal article supplement (doi:10.1039/d2tb00300g), 2022-01-01
Supplement: d2tb00300g1.pdf [file d2tb00300g1.pdf]

## Oral Nanozyme-Engineered Probiotics for the Treatment of Ulcerative Colitis

Huan Zhao<sup>1#</sup>, Yurong Du<sup>1, 3#</sup>, Lei Liu<sup>1, 3#</sup>, Yabing Du<sup>1</sup>, Kang Cui<sup>1</sup>, Pu Yu<sup>1</sup>, Li Li<sup>4</sup>,  
Yanjie Zhu<sup>5</sup>, Wei Jiang<sup>3</sup>, Zhen Li<sup>2\*</sup>, Hao Tang<sup>2\*</sup>, Wang Ma<sup>1\*</sup>

<sup>1</sup> Department of Oncology, The First Affiliated Hospital of Zhengzhou University, Zhengzhou, China

<sup>2</sup> National Health Commission Key Laboratory of Cardiovascular Regenerative Medicine, Heart Center of Henan Provincial People's Hospital, Central China Fuwai Hospital of Zhengzhou University, Fuwai Central China Cardiovascular Hospital & Central China Branch of National Center for Cardiovascular Diseases, Zhengzhou, Henan, 451464, China.

<sup>3</sup> Academy of Medical Sciences, Zhengzhou University, Zhengzhou 450052, Henan, China.

<sup>4</sup> The First Affiliated Hospital of Henan Polytechnic University, Jiaozuo 454003, China.

<sup>5</sup> Department of Pathology, Central Hospital of Kaifeng City, KaiFeng, Henan, 475000, China

\* Corresponding author.

Email: [lizhen630@126.com](mailto:lizhen630@126.com) (Z. Li); [tangpku\\_zzuhao@zzu.edu.cn](mailto:tangpku_zzuhao@zzu.edu.cn) (H. Tang);  
[doctormawang@126.com](mailto:doctormawang@126.com) (W. Ma)

# H. Z., Y. D. and L. L. contributed equally to this work.

## Supplementary Tables and figures

Table S1 Scoring system of histologic score

| Score <sup>a</sup> | Tissue damages                            | Lamina propria inflammatory cell infiltration     |
|--------------------|-------------------------------------------|---------------------------------------------------|
| 0                  | None                                      | infrequent                                        |
| 1                  | Isolated focal epithelial damage          | Increased, some neutrophils                       |
| 2                  | Mucosal erosions and ulcerations          | Submucosal presence of inflammatory cell clusters |
| 3                  | Extensive damage deep into the bowel wall | Transmural cell infiltrations                     |

<sup>a</sup> The sum of the two subcores results in a combined score ranging from 0 (no changes) to 6 (wide-spread cellular infiltrations and extensive tissue damage).

Table S2 Sequences of primers used for qRT-PCR

| Genes         | Primers                     |
|---------------|-----------------------------|
| TNF- $\alpha$ | F: CCCTCACACTCACAAACCAC     |
|               | R: ACAAGGTACAACCCATCGGC     |
| IL-1 $\beta$  | F: GCCACCTTTTGACAGTGATGAG   |
|               | R: ATGTGCTGCTGCGAGATTTG     |
| IL-6          | F: GAGGATACCACTCCCAACAGACC  |
|               | R: AAGTGCATCATCGTTGTTCATACA |
| MCP-1         | F: CCAATGAGTAGGCTGGAGA      |
|               | R: TCCTTCTTGGGGTCAGCACAGAC  |
| iNOS          | F: GGGCTGACCTGTTTCCTACT     |
|               | R: GGAGGTTGAGACCCAATGGA     |
| <i>OCN</i>    | F: TTGAAAGTCCACCTCCTTACAGA  |
|               | R: CCGGATAAAAAGAGTACGCTGG   |
| <i>TJP1</i>   | F: GCTTTAGCGAACAGAAGGAGC    |
|               | R: TTCATTTTCCGAGACTTCACCA   |
| GADPH         | F: AGGTCGGTGTGAACGGATTTG    |
|               | R: TGTAGACCATGTAGTTGAGGTCA  |

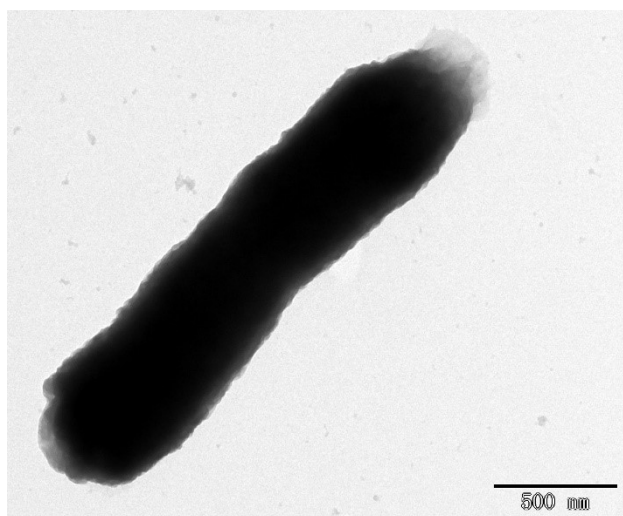

**Figure S1.** TEM image of ECN.

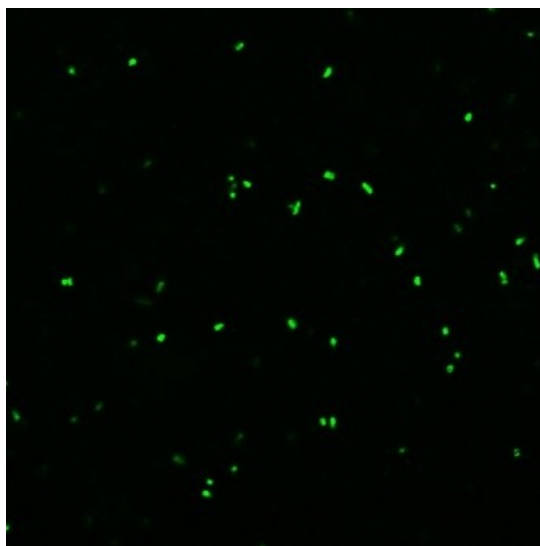

**Figure S2.** CLSM photo of FITC-Pt-Lipid@ECN.

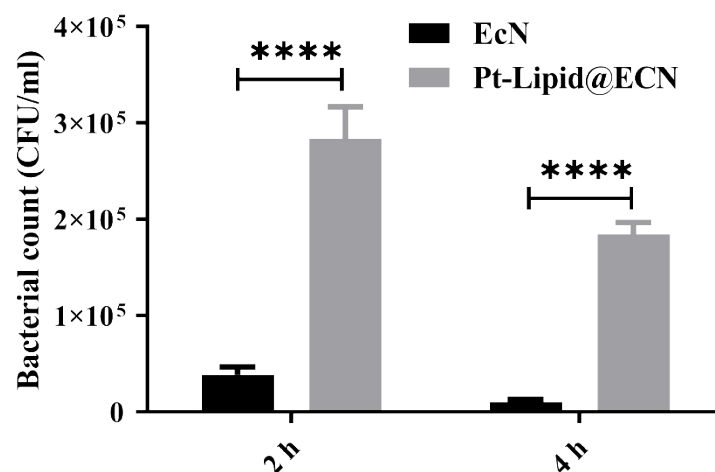

**Figure S3.** Resistance of Coated EcN against SGF supplemented with pepsin

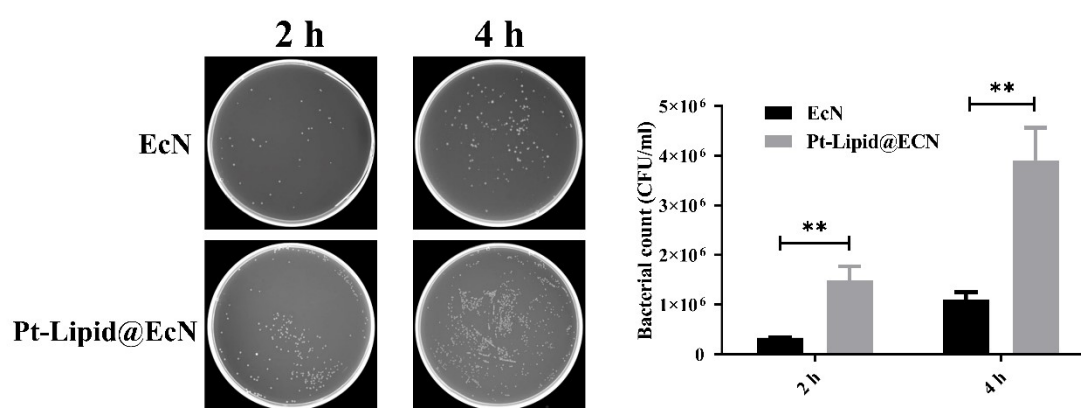

**Figure S4.** Resistance of Coated EcN against bile acid.

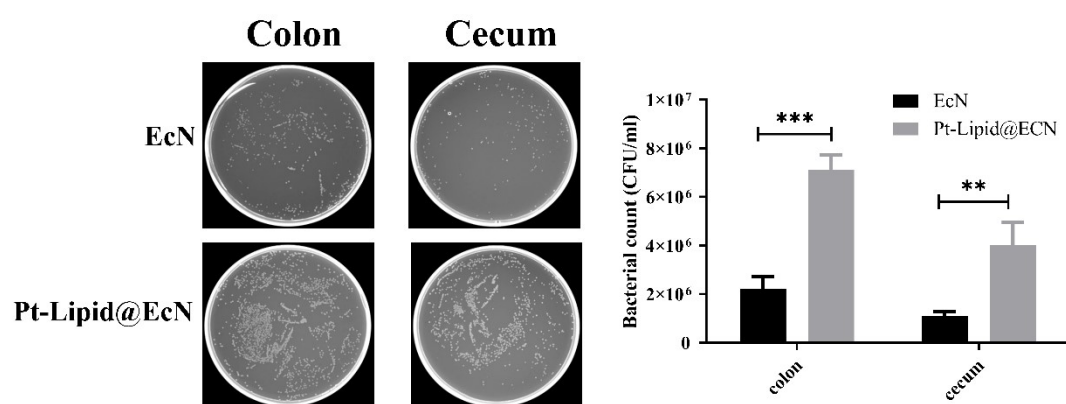

**Figure S5.** Overall survival rate of coated bacteria in colon and cecum.

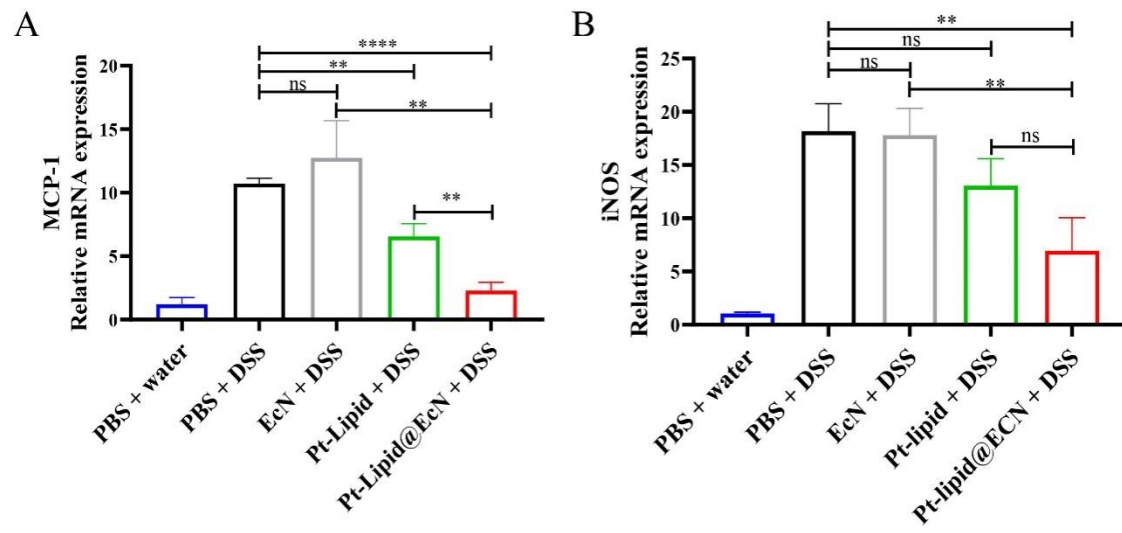

**Figure S6.** The mRNA expressions of inflammatory mediators MCP1 (A) and iNOS (B) in colonic tissue. \* $P < 0.05$ , \*\* $P < 0.01$ , \*\*\* $P < 0.005$ , \*\*\*\* $P < 0.001$ ; Student's t-test.
